# Supplementary material for: General surface circulation controls the interannual fluctuations of anchovy stock biomass in the Central Mediterranean Sea
Source: PubMed Central journal article supplement (PMC6994607; doi:10.1038/s41598-020-58028-0), 2020-01-31
Supplement: 41598_2020_58028_MOESM1_ESM.pdf [file 41598_2020_58028_MOESM1_ESM.pdf]

1  
2  
3  
4  
5  
6  
7  
8  
9  
10  
11  
12

Supplementary material to

**“General surface circulation controls the interannual fluctuations of anchovy  
stock biomass in the Central Mediterranean Sea”**

Bernardo Patti, Marco Torri\* and Angela Cuttitta

Institute of Anthropic Impacts and Sustainability in marine environment, National Research Council of  
Italy, 91021 Campobello di Mazara, Italy

\*Corresponding author. Email address: marco.torri@ias.cnr.it

13

14 **Supplementary Methods.** Handling of wind data in the Lagrangian simulations.

15 Within the Lagrangian simulation runs, the effect of wind on larval advection incorporated  
16 information about the expected vertical distribution of anchovy larvae in the water column.

17 Wind is typically included in particle-tracking models assuming that the surface wind-induced  
18 current (windage effect) is about 3% of the wind speed (Pugh, 1987; Stolzenbach et al., 1977), declining  
19 logarithmically to zero at approximately a depth generally assumed to be 20 m (Elliott, 1986). Previous  
20 studies showed that the bulk of the anchovy larval stages is concentrated in the surface layers of the  
21 water column, above the thermocline (Palomera, 1991; Coombs et al., 2003; Ospina-Álvarez et al., 2012b;  
22 Olivar et al., 2001, 2014). Therefore, a reference depth range of 1-10 m was adopted for the following  
23 calculation of the effect of wind forcing, as an additional factor contributing to larval advection simulated  
24 in the GNOME environment.

25 The wind-induced current at depth  $x$  (in meters) can be estimated using the following equation  
26 (Pugh, 1987):

27 
$$u_x = u_0 - \frac{u^*}{k} \ln\left(\frac{x}{z_0}\right)$$

28 where  $u_0$  is the surface wind-induced current,  $k = 0.4$  is the von Karman constant,  $u^*$  is the friction  
29 velocity that can be estimated as  $0.0012 \cdot W$ , with  $W$  being the wind speed 10 m above the sea surface,  
30 and finally  $z_0$  is the sea surface roughness length, fixed at 0.001 m. Taking into account the above  
31 formulation, the windage effect (i.e., the parameter used within GNOME accounting for the movement  
32 of particles induced by the wind) was set in the range 0.93-0.23%. These values represent the wind-  
33 induced current at the depths of 1 m and 10 m in terms of fractions of wind speed over the sea surface.

34

### 35 **References**

- 36 1. Coombs, S. H., Giovanardi, O., Halliday, N. C., Franceschini, G., Conway, D. V. P., Manzueto, L., Barrett,  
37 C. D. & McFadzen, I. R. B. (2003). Wind mixing, food availability and mortality of anchovy larvae  
38 *Engraulis encrasicolus* in the Northern Adriatic Sea. *Marine Ecology Progress Series*, 248, 221–235.
- 39 2. Elliott, A. J. (1986). Shear diffusion and the spread of oil in the surface layers of the North Seas.  
40 *German Journal of Hydrography*, 39, 113-137.

- 41 3. Olivar, M.P., Salat, J., & Palomera, I. (2001). Comparative study of spatial distribution patterns of the  
42 early stages of anchovy and pilchard in the NW Mediterranean Sea. *Marine Ecology Progress Series*,  
43 217, 111–120.
- 44 4. Olivar, M. P., Sabatés, A., Alemany, F., Balbín, R., de Puellas, M. L. F., & Torres, A. P. (2014). Diel-depth  
45 distributions of fish larvae off the Balearic Islands (western Mediterranean) under two environmental  
46 scenarios. *Journal of Marine Systems*, 138, 127–138.
- 47 5. Ospina-Álvarez, A., Parada, C., & Palomera, I. (2012). Vertical migration effects on the dispersion and  
48 recruitment of European anchovy larvae: From spawning to nursery areas. *Ecological Modelling*, 231,  
49 65-79.
- 50 6. Palomera, I. (1991). Vertical distribution of eggs and larvae of *Engraulis encrasicolus* in stratified  
51 waters of the western Mediterranean. *Marine Biology*, 111, 37–44.
- 52 7. Pugh, D. T. (1987). Tides, Surges and Mean Sea Level. Chichester: Wiley.
- 53 8. Stolzenbach, K. D., Madsen, O. S., Adams, E. E, Pollack, A. M., & Cooper, C. K. (1977). A Review and  
54 Evaluation of Basic Techniques for Predicting the Behavior of Surface Oil Slicks. Cambridge: Rep. 22,  
55 Dep. of Civ. Eng., Mass. Inst. Of Technol.

56

57

58

59

60

61

62

63

64

65

66

67

68

69

70 **Supplementary Figure S1.** Final positions of particles released in the dates June 21<sup>st</sup> and July 11<sup>th</sup> of the  
 71 years between 1997 and 2013 for Scenario 1. Yellow triangles represent the positions (variable by year)  
 72 of releasing starting points for particles (i.e., the stations scoring the 10 top highest anchovy eggs densities  
 73 in #/m<sup>3</sup> in each summer survey, from 1997 to 2013).

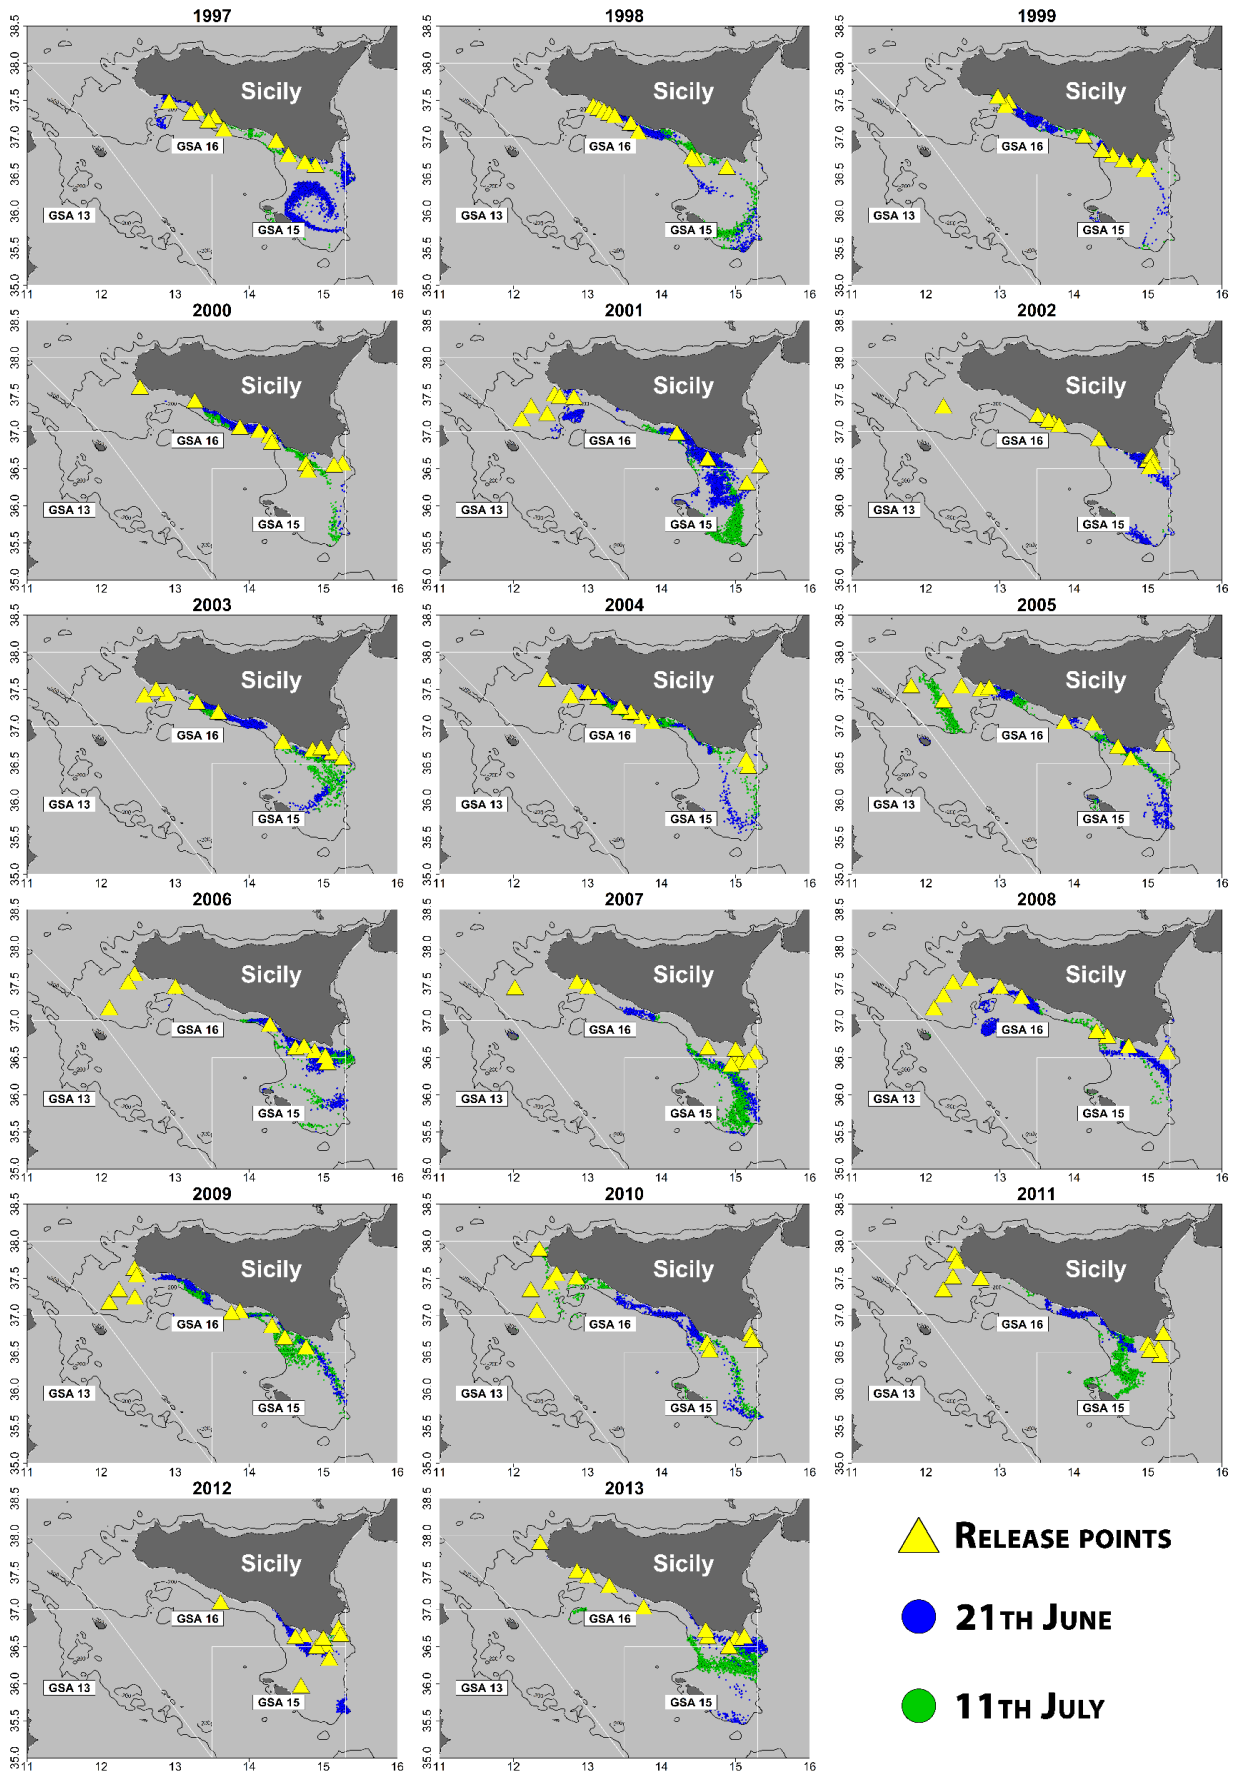

75 **Supplementary Figure S2.** Final positions of particles released in the dates June 21<sup>st</sup> and July 11th of the  
76 years between 1997 and 2013 for Scenario 2. Yellow lines represent the (fixed) positions of releasing  
77 starting points, placed on the main spawning grounds.

78

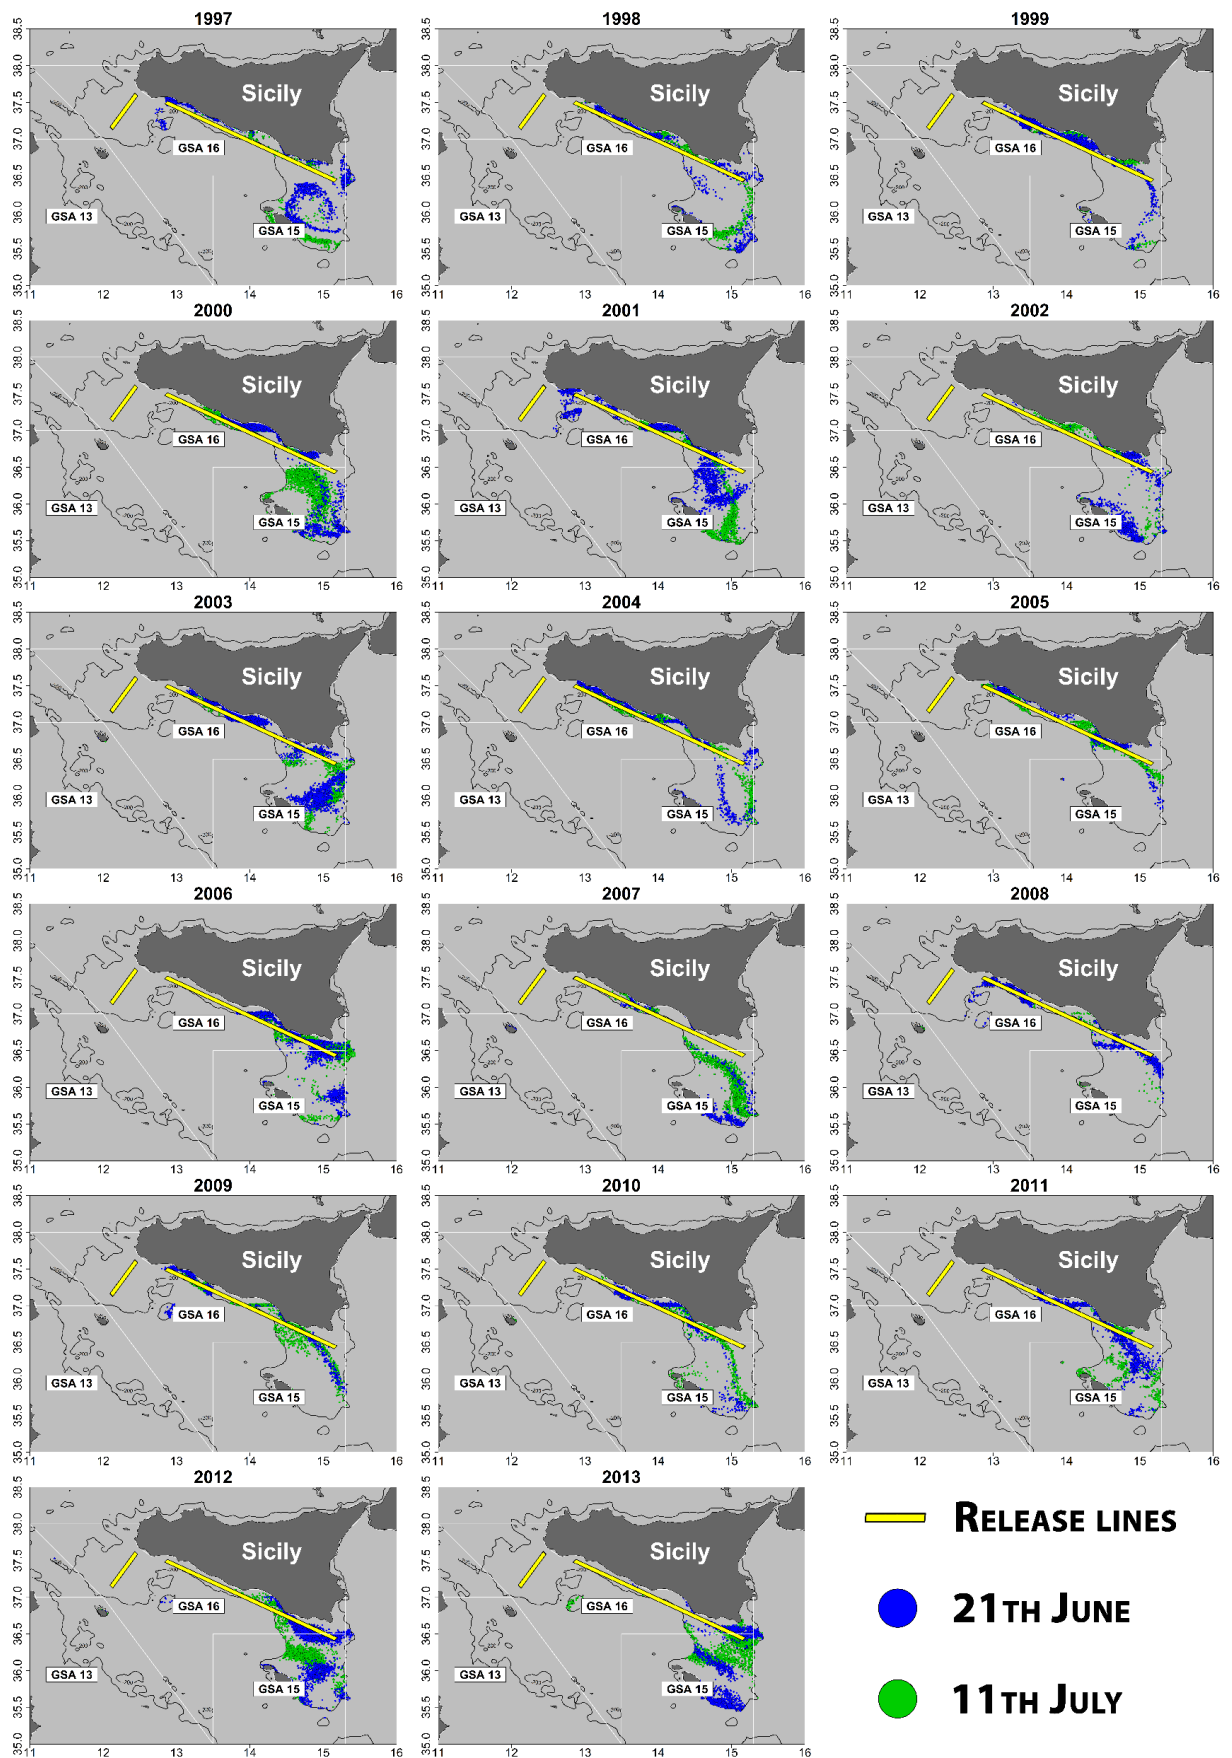

79
